# Supplementary material for: Expression Analysis of MaTGA8 Transcription Factor in Banana and Its Defence Functional Analysis by Overexpression in Arabidopsis
Source: Int J Mol Sci. 2021 Aug 28;22(17):9344. doi: 10.3390/ijms22179344 (PMC8430518; doi:10.3390/ijms22179344)
Supplement: Supplementary file 1 [file ijms-22-09344-s001.zip › TableS.xlsx]

## Sheet: Table S1
RT-qPCR Primer
	Primer Sequence (5'to3')
At-actinF	CGGCGAGTCATCGTCATCAATGT
At-actinR	GTTCGGGATTACGGTGGTGGGA
Ma-actinF	CGAGGCTCAATCAAAGA
Ma-actinR	ACCAGCAAGGTCCAAAC
MaTGA8 F	AAGTGGTGCCTCCATGACAG
MaTGA8 R	TGTCTTGGCATCAAGTTGCTT
MaNPR1 F	AGTGCTCTACGCCTCCTTCA
MaNPR1 R	TATGTCATCGGCTGCCACCT
MaNPR2 F	CCCTCACCTCCGACTTCCTC
MaNPR2 R	CTCCACAGTTGGCCTCCTCA
MaNPR3 F	AAGAGCGAAAGAACCGATACAA
MaNPR3 R	GAAGATGAAGCAGAGGCAGAAC
MaNPR4 F	AGGGAACTGGTGAGACAGAAAC
MaNPR4 R	TGAACTGAAAGGAATAGGAGGA
MaNPR5 F	GTCGCTGAGTTGTTAGACCTTG
MaNPR5 R	GATTCTTGACCCTGCTCTGTTC
MaNPR6 F	GCGGCTGCTTACTGTGAT
MaNPR6 R	TTGCCCTAGTTAGTCTCCTG
MaNPR7 F	ATTTGGAGGCAAGATGAACG
MaNPR7 R	GGAAGCCATGAGCAGGGTA
MaNPR8 F	CTCACTCGGCAATCTATCCC
MaNPR8 R	CTGCTATCACCAGCTCCATC
MaNPR9 F	GCACATCGGAGTTCACCTTAG
MaNPR9 R	GTGCCAGATGCTCTTCCTTGA
MaNPR10 F	CTCTTGTGCCAAATTATTCA
MaNPR10 R	TTTCAGGTCCTACTGTTCC
MaNPR11 F	CTTGGGCTTGCGGACGTTAA
MaNPR11 R	AGGTTCGCCTTGTTCGGTTG
MaNPR12 F	TACCCACGGACGAACACG
MaNPR12 R	ATGCCAAGATTCAGATACAC
MaNPR13 F	CGGGCTTGTCGCACATAGAA
MaNPR13 R	TCGGGATTCATCCGTGGGTA
MaNPR14 F	AATAACTGTGGTGCCGAAAGC
MaNPR14 R	ATGCCAAGATTCAGATACAC
MaNPR15 F	TCGACATTCTCCGCAACC
MaNPR15 R	ACCGCCTCCGCCACTTTT

## Sheet: TableS2
MaTGA8 cloning specific primer
MaTGA8 F	CTGGAAGGGAAGAGGGTT
MaTGA8 R	AAGAAATGCCAAAGGAGG
