# Supplementary figures and images for: Expression Analysis of MaTGA8 Transcription Factor in Banana and Its Defence Functional Analysis by Overexpression in Arabidopsis
Source: MDPI journal article supplement (doi:10.3390/ijms22179344), 2021-08-28

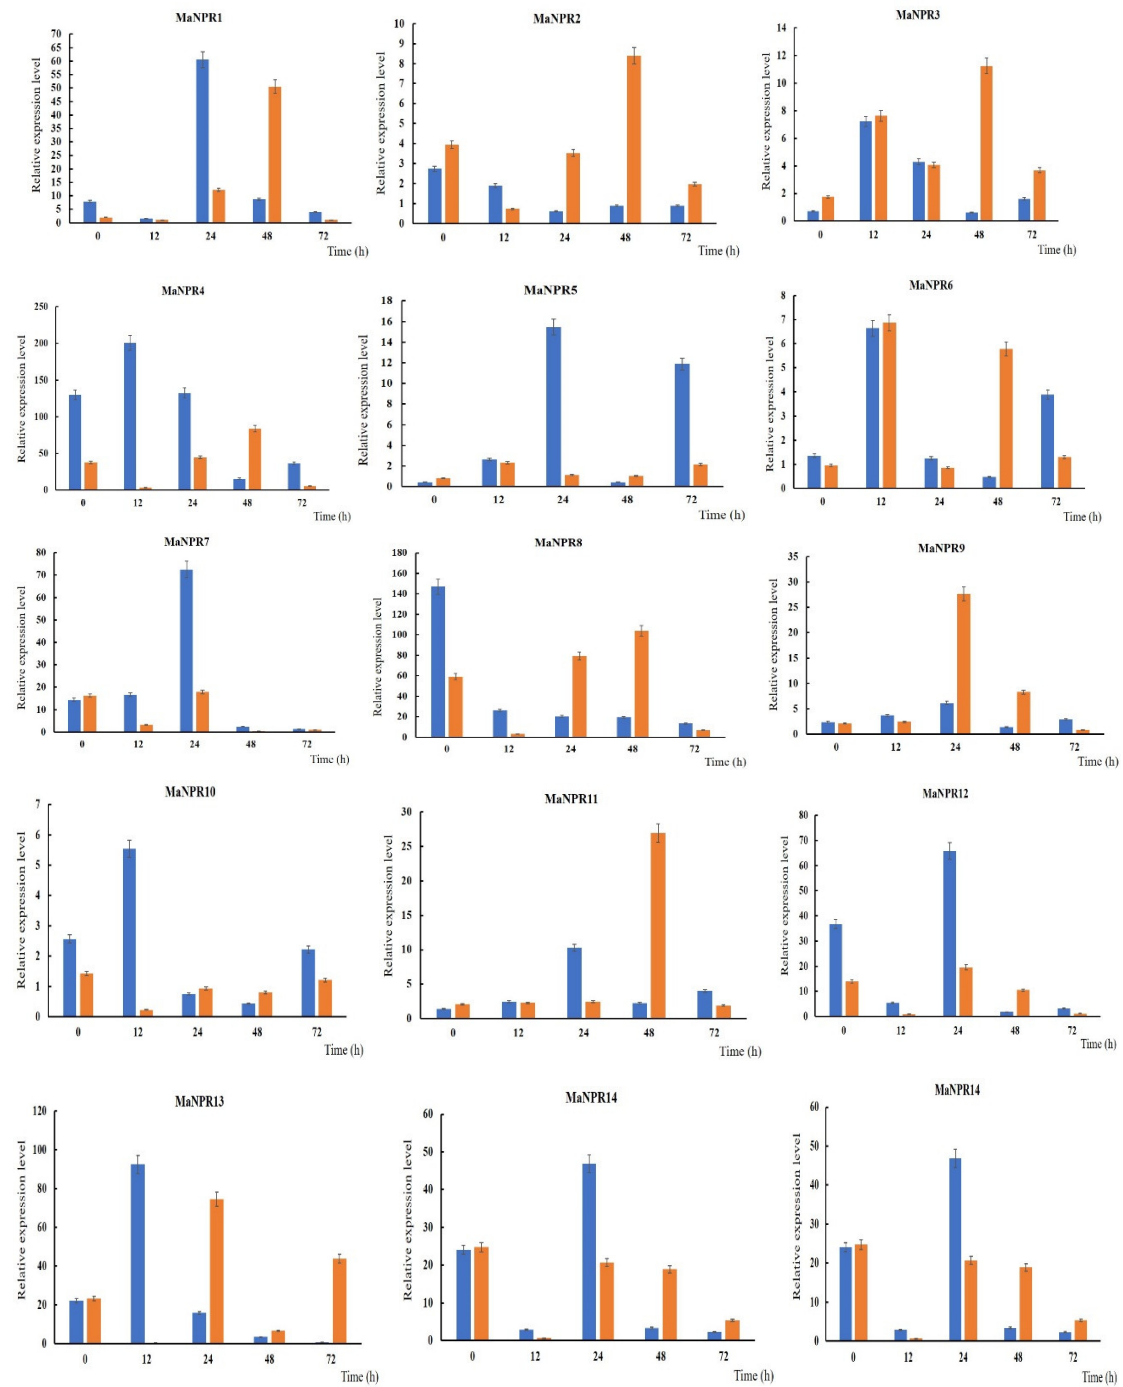

**Figure S1.** The relative expression of MaNPR1 family members under SA treatment.

Supplement: s1 [file s1]
